# Supplementary material for: Intra-Articular Polyacrylamide Hydrogel Injections Improve Pain and Function in Knee Osteoarthritis: A Multicenter Retrospective Study
Source: Research Square preprint supplement (doi:10.21203/rs.3.rs-7873869/v1), 2025-11-19
Supplement: Supplementary file 1 [file d18394577135db724a0f1306.docx]

**Suplementary Material:**


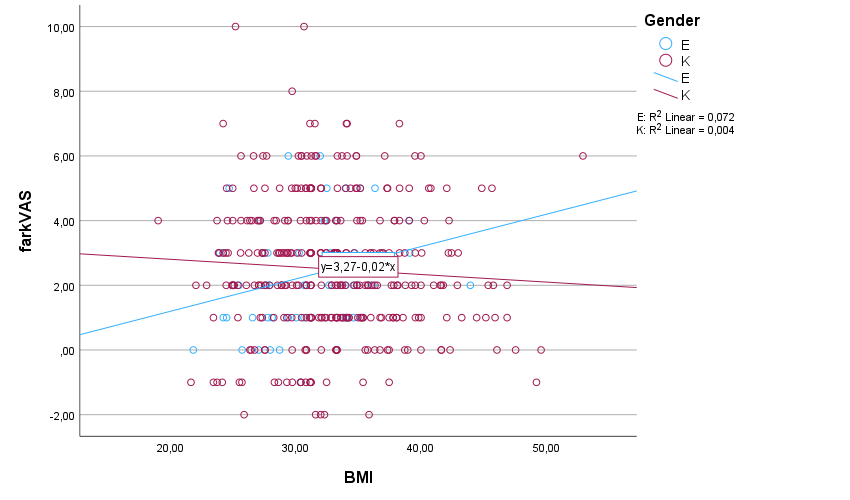

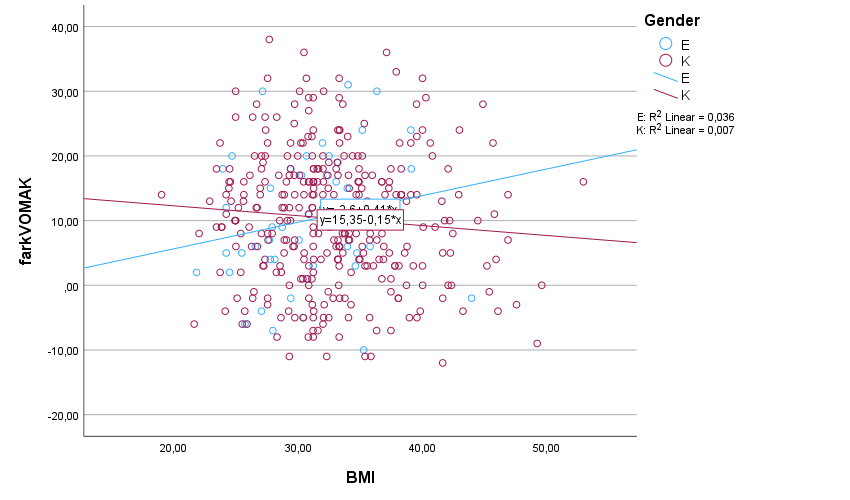

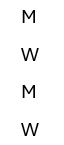


**Change in VAS**

M: R2 Linear = 0.072

W: R2 Linear = 0.004

Although not statistically significant, the relationship between BMI and changes in VAS scores differed by sex. In men, higher BMI was associated with greater improvement in VAS scores, whereas in women, higher BMI was associated with smaller improvements.

M: R2 Linear = 0.036

W: R2 Linear = 0.007


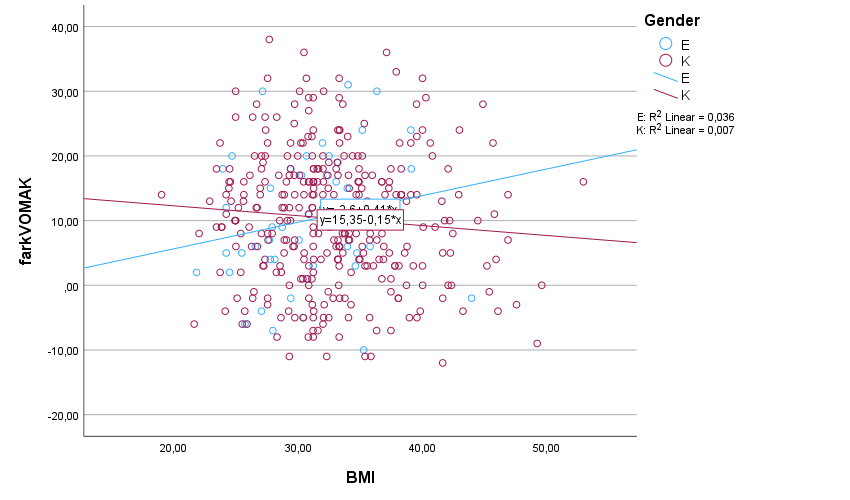

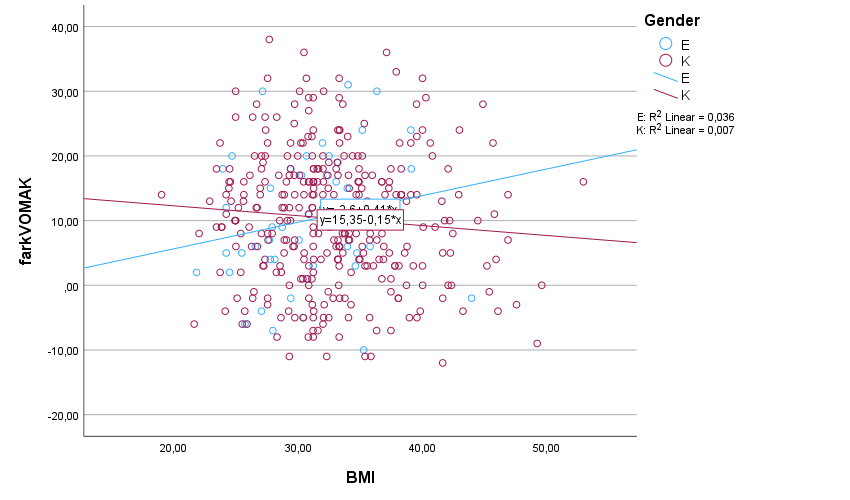

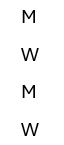


**Change in WOMAC**

Although not statistically significant, the relationship between BMI and changes in WOMAC scores differed by sex. In men, higher BMI was associated with greater improvement in WOMAC scores, whereas in women, higher BMI was associated with smaller improvements.


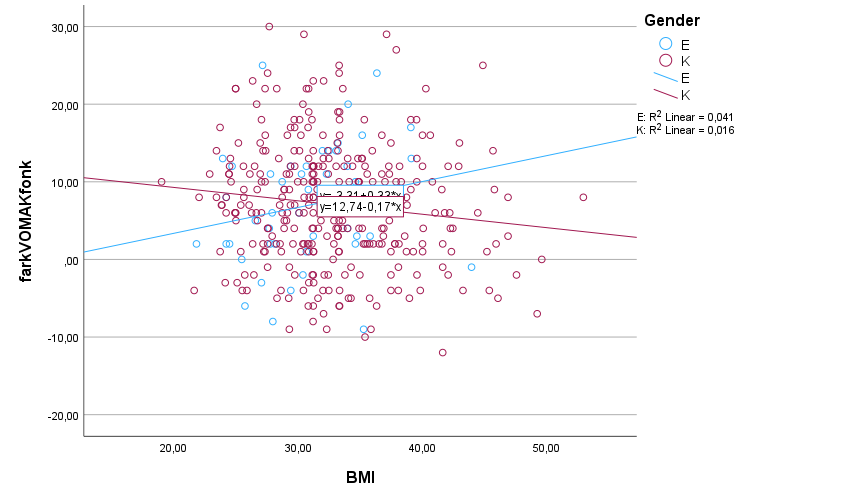

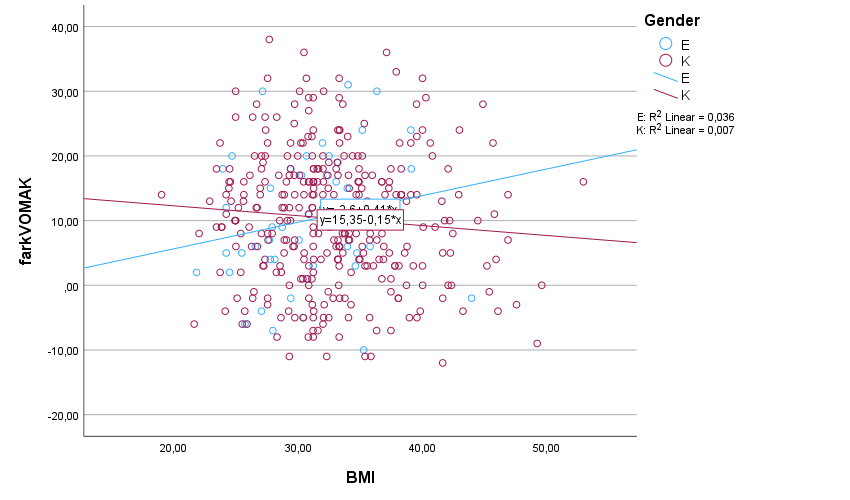

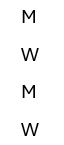


**Change in WOMAC Function**

M: R2 Linear = 0.041

W: R2 Linear = 0.016

Although not statistically significant, the relationship between BMI and changes in WOMAC Function scores differed by sex. In men, higher BMI was associated with greater improvement in WOMAC Function scores, whereas in women, higher BMI was associated with smaller improvements.

|  | **Baseline score** | **12 months** | **Mean difference** | **95% CI of the difference** | |
| --- | --- | --- | --- | --- | --- |
| **Lower** | **Upper** |
| **VAS** | | | | | |
| 40–54 years | 7.57(1.16)  N=23 | 5.13(1.84)  N=23 | 2.43 | 1.66 | 3.20 |
| 55–64 years | 7.52(1.11)  N=104 | 4.67(1.90)  N=104 | 2.85 | 2.47 | 3.24 |
| 65–74 years | 7.60(1.17)  N=168 | 5.19(2.06)  N=168 | 2.41 | 2.08 | 2.75 |
| ≥75 years | 7.72(1.01)  N=92 | 5.55(1.82)  N=92 | 2.17 | 1.77 | 2.57 |
| **WOMAC Function** | | | | | |
| 40–54 years | 41.86(6.86)  N=23 | 35.00(10.79)  N=23 | 6.86 | 3.28 | 10.45 |
| 55–64 years | 39.71(6.89)  N=103 | 32.18(9.46)  N=103 | 7.53 | 6.01 | 9.05 |
| 65–74 years | 41.06(7.59)  N=168 | 34.26(10.37)  N=168 | 6.80 | 5.58 | 8.02 |
| ≥75 years | 42.63(7.33)  N=92 | 35.74(10.12)  N=92 | 6.89 | 5.50 | 8.27 |
| **WOMAC Total** | | | | | |
| 40–54 years | 59.04(9.02)  N=23 | 48.83(14.56)  N=23 | 10.21 | 5.43 | 14.99 |
| 55–64 years | 56.02(9.64)  N=104 | 44.68(12.49)  N=104 | 11.34 | 9.42 | 13.27 |
| 65–74 years | 58.22(10.59)  N=168 | 48.10(13.93)  N=168 | 10.12 | 8.49 | 11.75 |
| ≥75 years | 59.65(9.75)  N=92 | 50.33(12.74)  N=92 | 9.32 | 7.51 | 11.13 |

Table. Changes in VAS and WOMAC (function and total) scores from baseline to 12 months after intra-articular PAAG hydrogel injection, stratified by age categories (40–54, 55–64, 65–74, and ≥75 years). Data are expressed as mean ± SD, along with mean differences and 95% CI.

|  | **Baseline score** | **12 months** | **Mean difference** | **95% CI of the difference** | |
| --- | --- | --- | --- | --- | --- |
| **Lower** | **Upper** |
| **VAS** | | | | | |
| ≤24.9 kg/m2 | 7.16(1.05)  N=27 | 4.90(1.75)  N=27 | 2.26 | 1.32. | 3.19 |
| 25.0–29.9 kg/m2 | 7.35(1.06)  N=92 | 4.97(1.83)  N=92 | 2.38 | 1.93 | 2.83 |
| ≥30.0 kg/m2 | 7.75(1.12)  N=268 | 5.28(2.02)  N=268 | 2.47 | 2.22 | 2.72 |
| **WOMAC Function** | | | | | |
| ≤24.9 kg/m2 | 38.91(6.92)  N=27 | 31.18(8.77)  N=27 | 7.73 | 5.36 | 10.10 |
| 25.0–29.9 kg/m2 | 39.59(7.60)  N=92 | 32.92(9.43)  N=92 | 6.67 | 5.02 | 8.33 |
| ≥30.0 kg/m2 | 41.70(7.02)  N=268 | 34.90(10.34)  N=268 | 6.80 | 5.87 | 7.73 |
| **WOMAC Total** | | | | | |
| ≤24.9 kg/m2 | 54.50(9.16)  N=27 | 43.90(11.87)  N=27 | 10.60 | 7.34 | 13.87 |
| 25.0–29.9 kg/m2 | 55.20(10.35)  N=92 | 45.73(12.35)  N=92 | 9.47 | 7.33 | 11.61 |
| ≥30.0 kg/m2 | 59.20(9.58)  N=268 | 49.03(13.65)  N=268 | 10.17 | 8.93 | 11.41 |

Table . Changes in VAS and WOMAC (function and total) scores from baseline to 12 months after intra-articular PAAG hydrogel injection according to body mass index (BMI) categories. Data are shown as mean ± SD, together with mean differences and 95% CI for each group.
